# Supplementary material for: Encapsulation of atomically thin gold nanosheets within porous silica for enhanced structural stability and superior catalytic performance
Source: Royal Society of Chemistry journal article supplement (doi:10.1039/d2nj03221j), 2022-01-01
Supplement: d2nj03221j1.pdf [file d2nj03221j1.pdf]

## Supporting information

### **Encapsulation of Atomically Thin Gold Nanosheets within Porous Silica for Enhanced Structural Stability and Superior Catalytic Performance**

Thiruparasakthi Balakrishnan and Sung-Min Choi\*

*Department of Nuclear and Quantum Engineering, Korea Advanced Institute of Science and  
Technology, Daejeon, 34141, Republic of Korea.*

\*Email: [sungmin@kaist.ac.kr](mailto:sungmin@kaist.ac.kr)

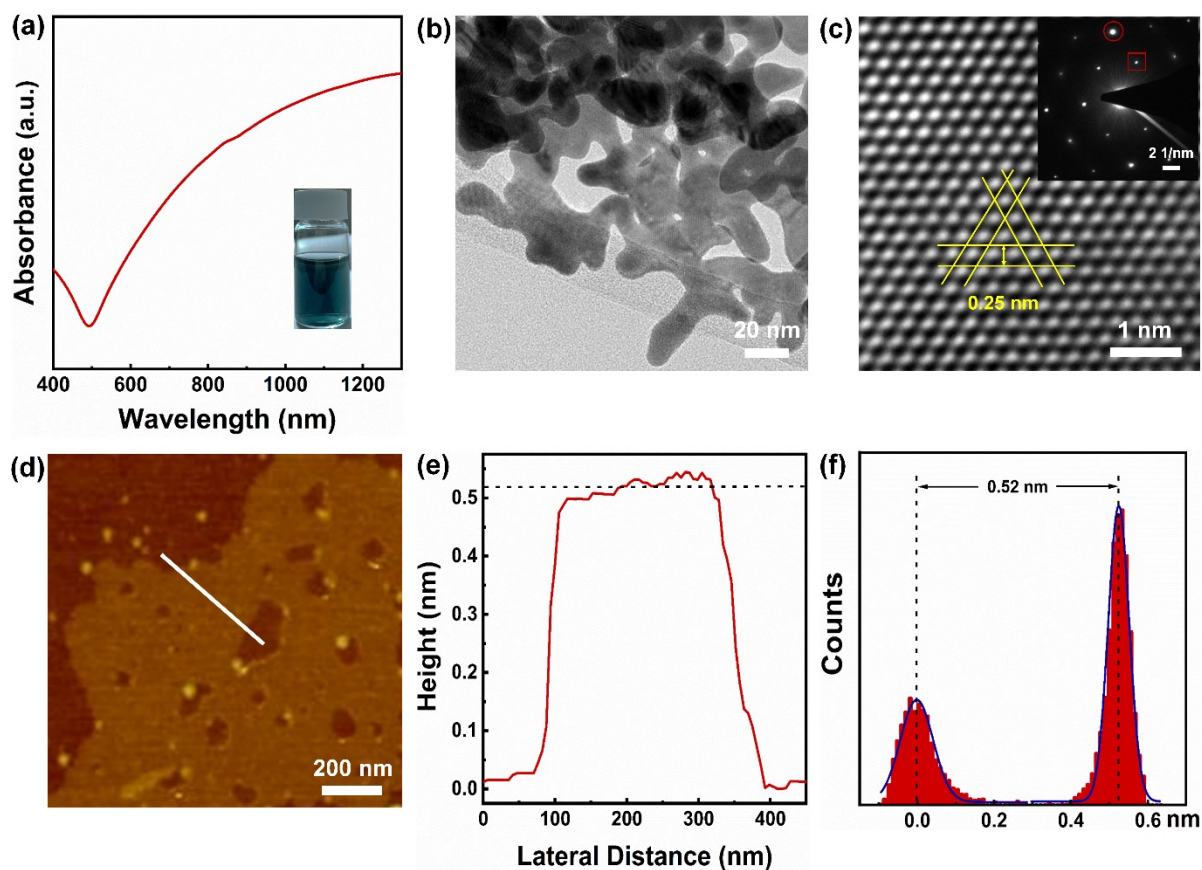

**Figure S1.** (a) UV-vis-NIR spectrum and photograph (inset) of as-prepared AuNSs dispersed in water (0.5 mg/ml). (b) TEM, (c) HR-TEM, (d) AFM images of isolated AuNSs for which samples were prepared in grids from the AuNSs dispersion in water at dilute concentration (0.05 mg/ml). The inset in (c) shows the SAED pattern. (e) Height profile (along the white line in (d)) and (f) Height histogram measured from the AFM image.

The as-prepared AuNSs samples dispersed in water (0.5 mg/ml) display green-blue color as shown in the inset of Figure S1a. The UV-vis-NIR spectrum of as-prepared AuNSs dispersed in water exhibit a broad absorption band in the region of 500-1300 nm (Figure S1a). For TEM and AFM measurements, as-prepared AuNSs dispersed in water at dilute concentration (0.05 mg/ml) was drop-casted on TEM grid and freshly cleaved muscovite mica, respectively, and dried at room temperature. The TEM image shows translucent and seaweed-like AuNSs (Figure S1b) and the HR-TEM image reveals a six-fold symmetric structure with

a lattice spacing of 0.25 nm (Figure S1c).<sup>1,2,3</sup> The SAED pattern in the [111] zone axis shows two sets of six-fold symmetric spots (inset of Figure S1c). One set of spots corresponds to the allowed {220} reflections with a lattice spacing of 0.144 nm and the other one corresponds to the forbidden  $1/3$  {422} reflections with a lattice spacing of 0.250 nm. The presence of the forbidden  $1/3$  {422} reflections suggests that the surface of ultrathin AuNS is atomically flat.<sup>4,5,6</sup> The HR-TEM and SAED results indicate the single crystalline nature of AuNSs.<sup>1,6</sup> The height profile and height histogram obtained from the AFM image show that the thickness of AuNSs is ca. 0.52 nm indicating that the as-prepared AuNSs are two atomic layers thick (Figure S1d, e, and f).

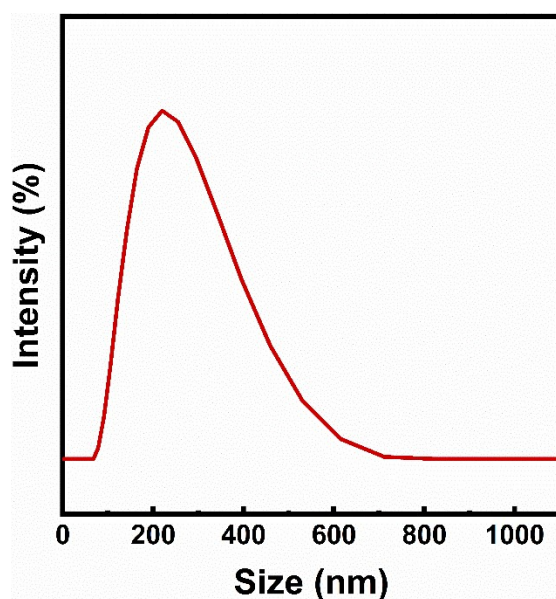

**Figure S2.** Distribution of hydrodynamic diameter of as-prepared AuNSs dispersed in water.

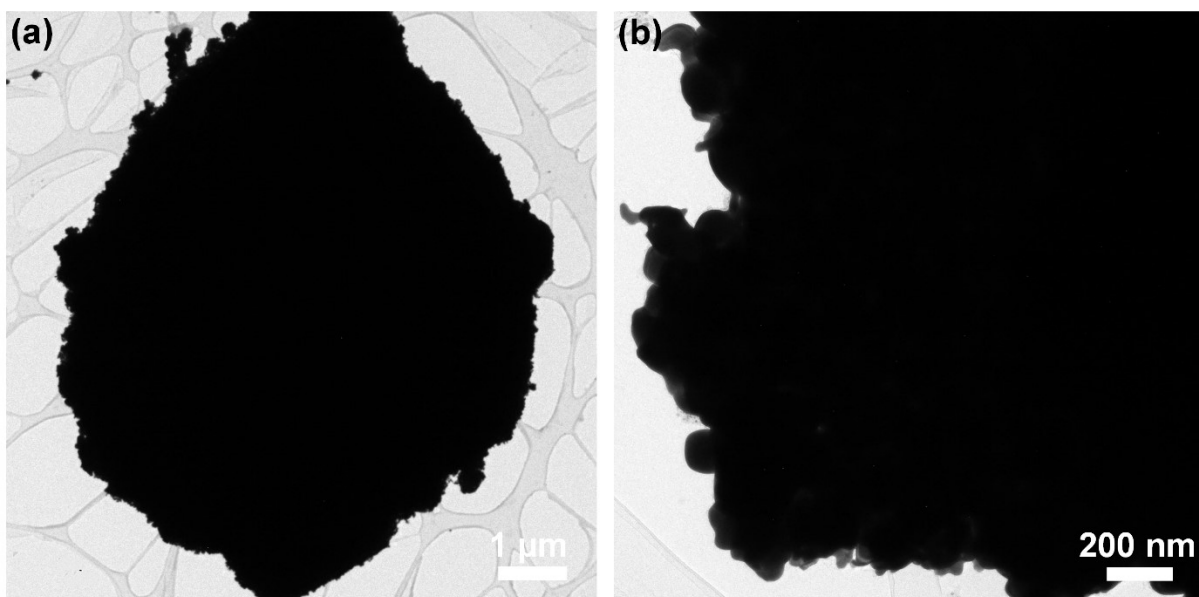

**Figure S3:** Low magnification TEM images of AuNSs in the dried state. The samples were prepared by placing the dispersions of AuNSs in water (0.5 mg/ml) on TEM grids and drying at room temperature.

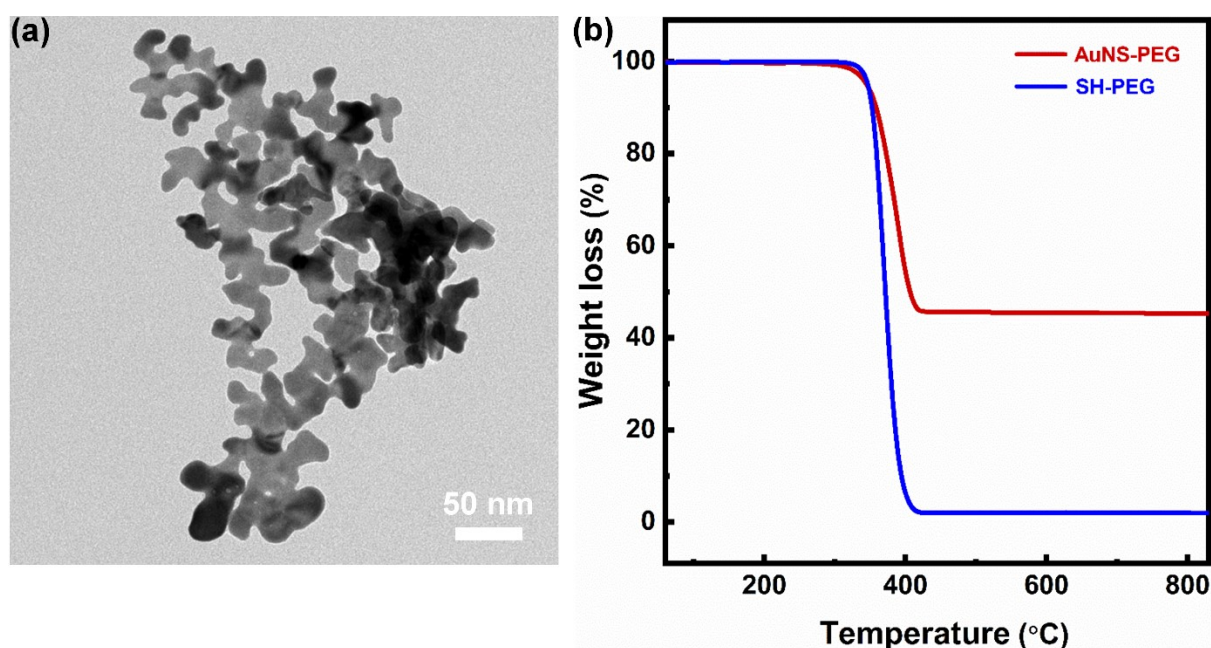

**Figure S4.** (a) TEM image of AuNSs functionalized with SH-PEG (AuNS-PEG). (b) TGA of AuNS-PEG and SHPEG. The TGA results of both AuNS-PEG and SHPEG show a drastic weight loss at around 400 °C, which is due to the degradation of the SHPEG molecules.

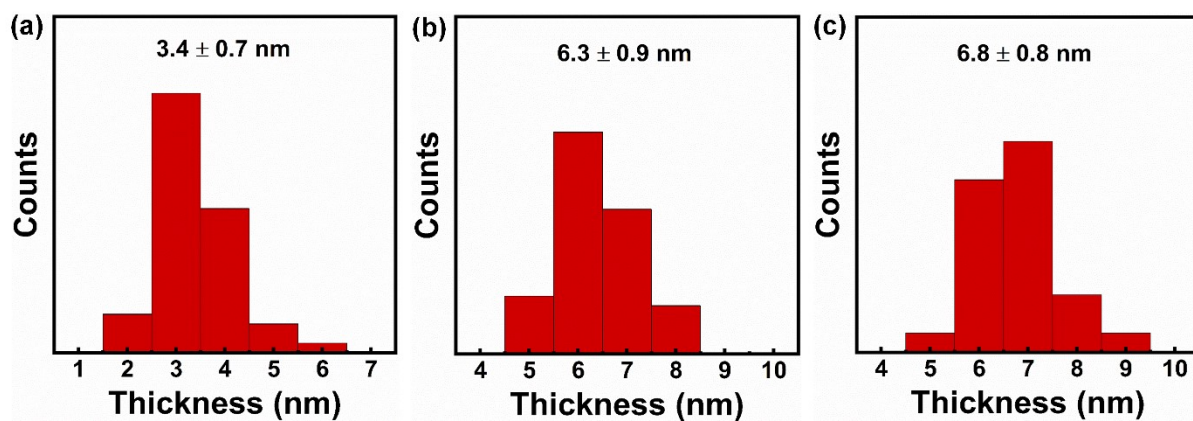

**Figure S5.** Distribution of silica layer thickness measured from the TEM images of silica-encapsulated AuNS-PEG prepared with different amounts of TEOS, (a) 30  $\mu\text{l}$ , (b) 60  $\mu\text{l}$ , and (c) 90  $\mu\text{l}$ . The average thicknesses of silica layer are ca. 3.4, ca. 6.3, and ca. 6.8 nm, respectively.

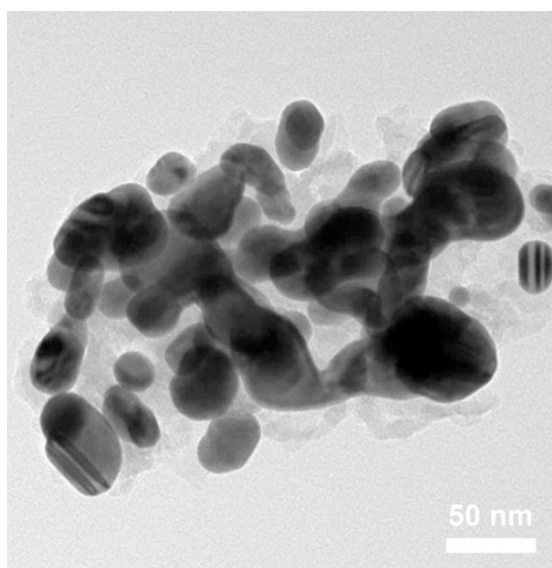

**Figure S6.** TEM image of AuNSs encapsulated with ca. 3.4 nm thick silica layer after UV-ozone treatment.

**Table S1.** Elemental analysis of AuNSs encapsulated with ca. 6.3 nm thick silica layer before and after UV-ozone treatment.

| Sample                    | C (wt%) | H (wt%) | S (wt%) |
|---------------------------|---------|---------|---------|
| Before UV-ozone treatment | 11.43   | 2.41    | 0.98    |
| After UV-ozone treatment  | 0.35    | 0.25    | 0.02    |

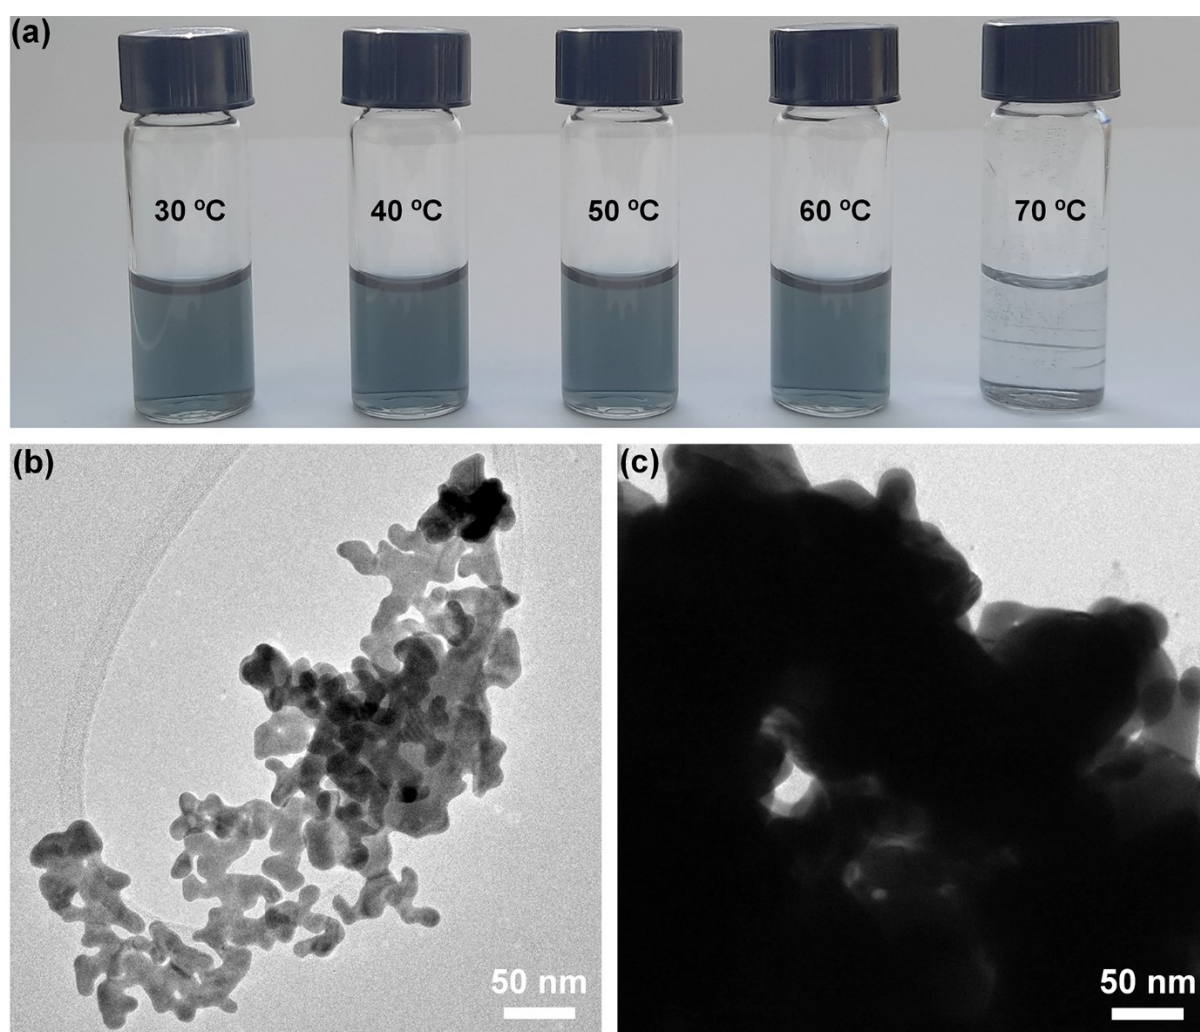

**Figure S7.** (a) Photographs of as-prepared AuNS dispersions in water (0.5 mg/ml) treated at different temperatures for 2 hours in a water bath. The TEM images were obtained for the samples treated at (b) 60 °C and (c) 70 °C.

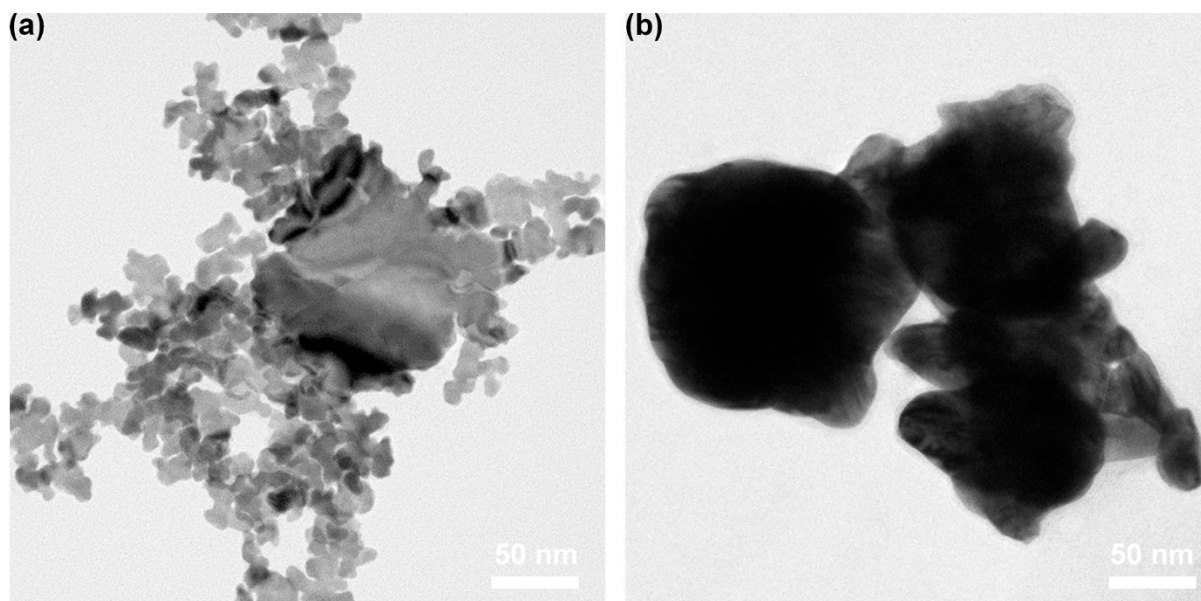

**Figure S8.** TEM images of isolated AuNSs deposited on TEM grids and treated at (a) 60 °C and (b) 70 °C for 2 hours in an oven.

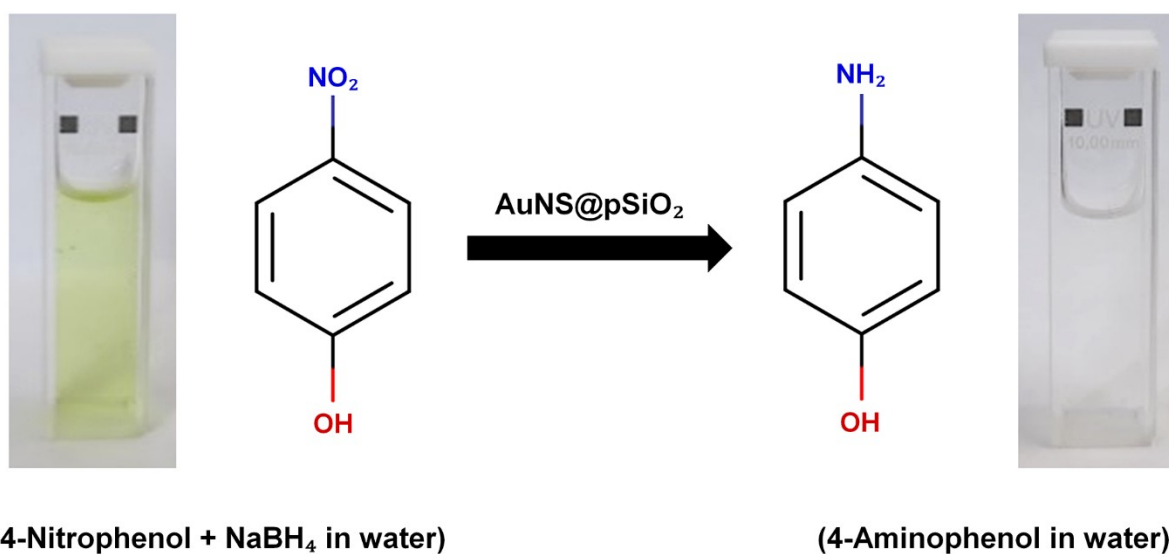

**Figure S9.** Photographs show the colour change of 4-NPh solution before and after catalytic reduction with AuNS@pSiO<sub>2</sub>.

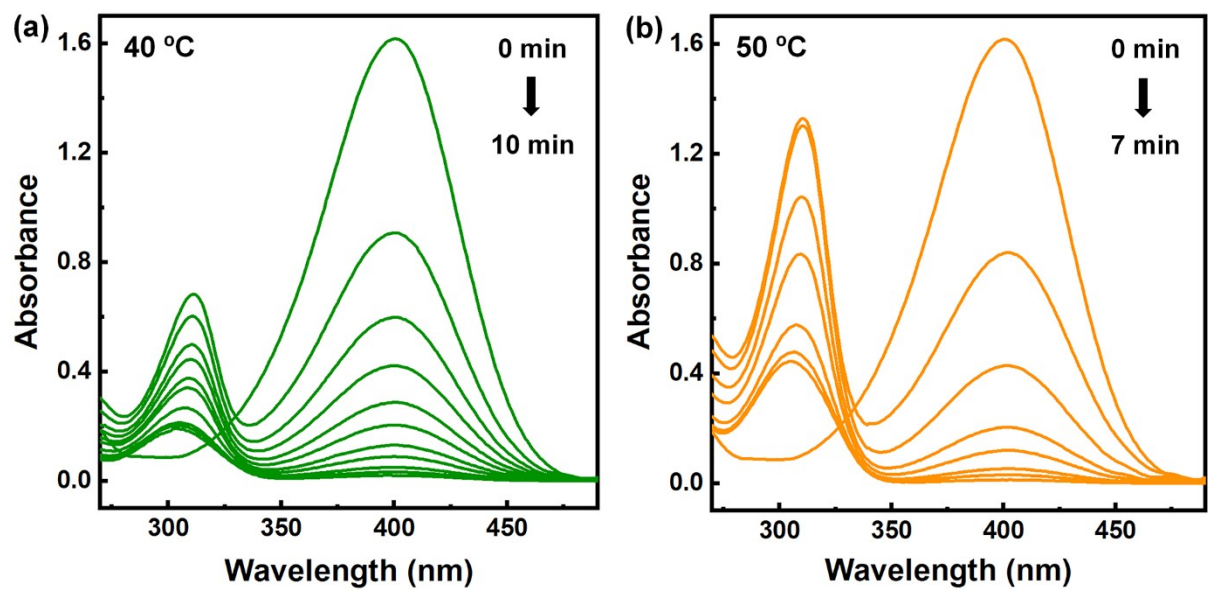

**Figure S10.** UV-vis absorption spectra monitoring the catalytic reduction of 4-NPh at (a) 40 °C and (b) 50 °C with time after the addition of AuNS@pSiO<sub>2</sub>.



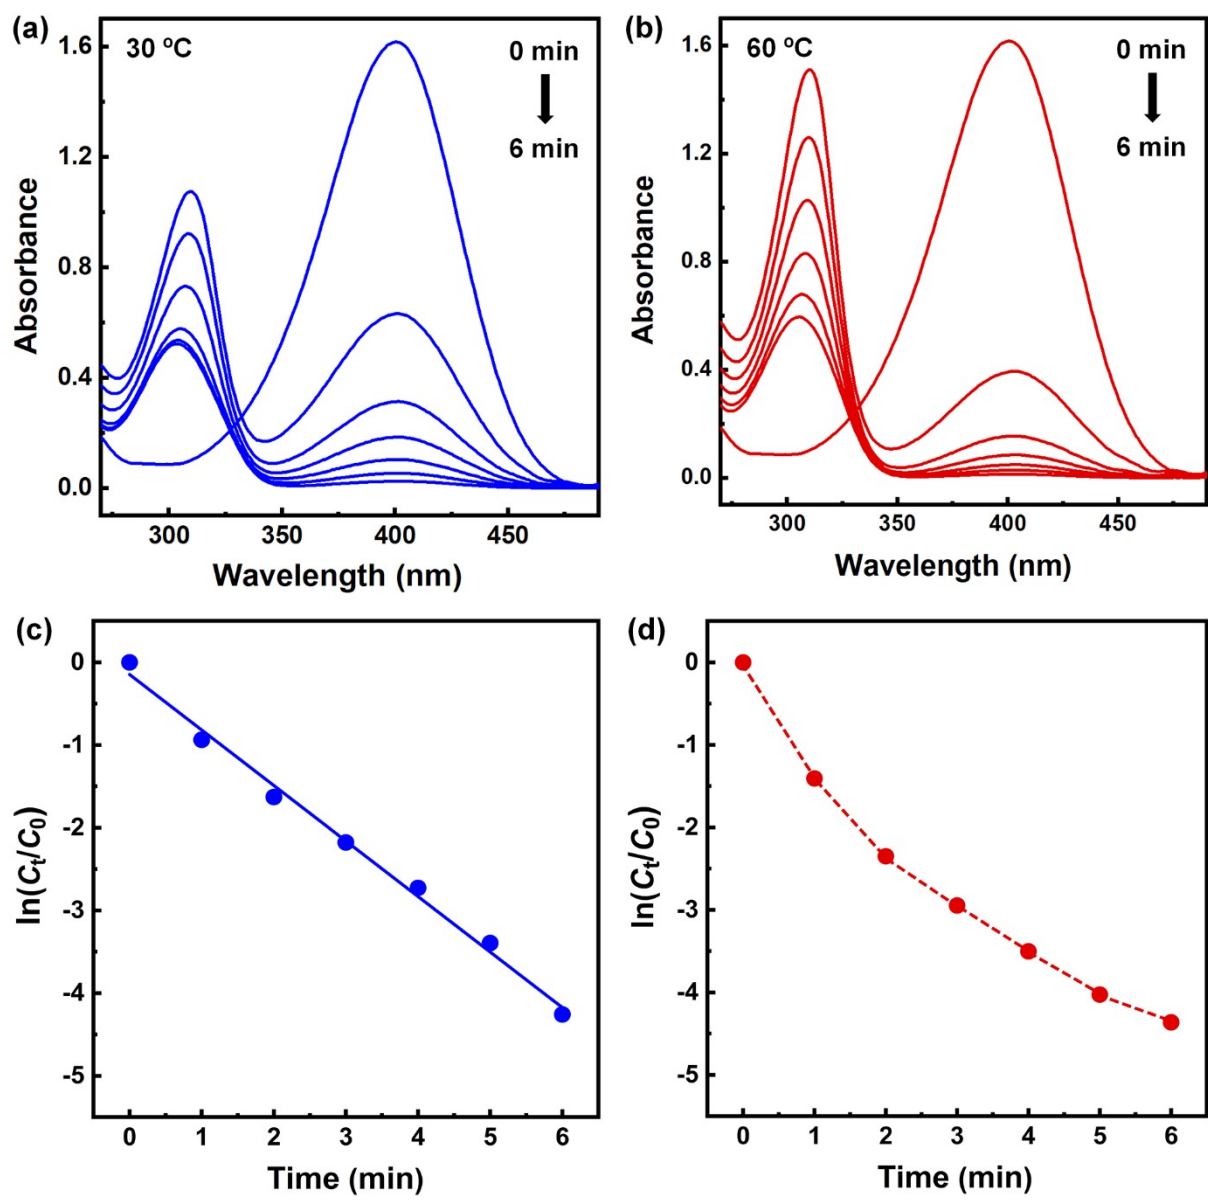

**Figure S11.** UV-vis absorption spectra monitoring the catalytic reduction of 4-NPh at (a) 30 °C and (b) 60 °C with time after the addition of as-prepared AuNSs. (c, d) The corresponding plots of  $\ln(C_t/C_0)$  against reaction time, which is linear for the reaction at 30 °C (the estimated rate constant  $k$  is  $0.67 \text{ min}^{-1}$ ) and non-linear for the reaction at 60 °C (indicating that as-prepared AuNSs might be aggregated during the catalytic reaction).

## References:

- 1 S. Ye, A. P. Brown, A. C. Stammers, N. H. Thomson, J. Wen, L. Roach, R. J. Bushby, P. L. Coletta, K. Critchley, S. D. Connell, A. F. Markham, R. Brydson and S. D. Evans, *Adv. Sci.*, 2019, **6**, 1900911.
- 2 W. Xin, J. Severino, I. M. De Rosa, D. Yu, J. McKay, P. Ye, X. Yin, J. M. Yang, L. Carlson and S. Kodambaka, *Nano Lett.*, 2018, **18**, 1875–1881.
- 3 M. Zhou, M. Lin, L. Chen, Y. Wang, X. Guo, L. Peng, X. Guo and W. Ding, *Chem. Commun.*, 2015, **51**, 5116–5119.
- 4 S. Ye, S. D. Connell, J. R. McLaughlan, L. Roach, Z. Aslam, N. Chankhunthod, A. P. Brown, R. Brydson, R. J. Bushby, K. Critchley, P. L. Coletta, A. F. Markham and S. D. Evans, *Adv. Funct. Mater.*, 2020, **30**, 2003512.
- 5 H. L. Qin, D. Wang, Z. L. Huang, D. M. Wu, Z. C. Zeng, B. Ren, K. Xu and J. Jin, *J. Am. Chem. Soc.*, 2013, **135**, 12544–12547.
- 6 J. Niu, D. Wang, H. Qin, X. Xiong, P. Tan, Y. Li, R. Liu, X. Lu, J. Wu, T. Zhang, W. Ni and J. Jin, *Nat. Commun.*, 2014, **5**, 1–7.
